# Supplementary material
Source: PubMed Central journal article supplement (PMC1450144)
Supplement: pnas_0600199103_2.pdf [file pnas_0600199103_2.pdf]

**Table 1. Protein coding genes**

| <b>Megabase (Mb) interval</b> | <b>VEGA locus identification no. (longest 5' end located within Mb interval)</b> | <b>Curated locus</b> | <b>Mouse gene symbol (identifier in MGD)</b> | <b>Mouse gene name</b>           | <b>Orthologous human gene symbol</b> | <b>Comment</b> |
|-------------------------------|----------------------------------------------------------------------------------|----------------------|----------------------------------------------|----------------------------------|--------------------------------------|----------------|
| 1                             | OTTMUSG000000002<br>41                                                           | <i>Zfp618</i>        | <i>Zfp618</i>                                | Zinc finger protein 681          | <i>ZNF618</i>                        |                |
|                               | OTTMUSG000000090<br>32                                                           | <i>Ambp</i>          | <i>Ambp</i>                                  | $\alpha$ 1 microglobulin         | <i>AMBP</i>                          |                |
|                               | OTTMUSG000000002<br>43                                                           | <i>Kif12</i>         | <i>Kif12</i>                                 | kinesin family member 12         | <i>KIF12</i>                         |                |
|                               | OTTMUSG000000002<br>44                                                           | <i>Col27a1</i>       | <i>Col27a1</i>                               | procollagen, type XXVII, alpha 1 | <i>COL27A1</i>                       |                |
|                               | OTTMUSG000000003<br>05                                                           | <i>Orm1</i>          | <i>Orm1</i>                                  | orosomuroid 1                    | <i>ORM1</i>                          |                |
|                               | OTTMUSG000000002<br>45                                                           | <i>Orm2</i>          | <i>Orm3</i>                                  | orosomuroid 3                    | absent                               |                |
|                               | OTTMUSG000000003                                                                 | <i>Orm3</i>          | <i>Orm2</i>                                  | orosomuroid 2                    | <i>ORM2</i>                          |                |

| Megabase (Mb) interval | VEGA locus identification no. (longest 5' end located within Mb interval) | Curated locus   | Mouse gene symbol (identifier in MGD) | Mouse gene name                                       | Orthologous human gene symbol | Comment                                 |
|------------------------|---------------------------------------------------------------------------|-----------------|---------------------------------------|-------------------------------------------------------|-------------------------------|-----------------------------------------|
|                        | 06                                                                        |                 |                                       |                                                       |                               |                                         |
|                        | OTTMUSG000000002<br>47                                                    | <i>Akna</i>     | <i>Akna</i>                           | AT-hook transcription factor                          | <i>AKNA</i>                   |                                         |
|                        | OTTMUSG000000002<br>49                                                    | <i>Whrn</i>     | <i>Whrn</i>                           | whirlin                                               | <i>DFNB31</i>                 |                                         |
|                        | OTTMUSG000000003<br>12                                                    | <i>Atp6v1g1</i> | <i>Atp6v1g1</i>                       | ATPase, H+ transporting, V1 subunit G isoform 1       | <i>ATP6V1G1</i>               |                                         |
|                        | OTTMUSG000000002<br>50                                                    | RP23-230C2.2    | <i>6330416G13Rik</i>                  | RIKEN cDNA<br>6330416G13 gene                         | <i>C9orf91</i>                |                                         |
|                        | OTTMUSG000000002<br>51                                                    | RP23-230C2.3    | 1700018C11Rik                         | RIKEN cDNA<br>1700018C11 gene                         | absent                        | 110 amino acid ORF, no human orthologue |
| 2                      | OTTMUSG000000003<br>03                                                    | <i>Tnfsf15</i>  | <i>Tnfsf15</i>                        | tumor necrosis factor (ligand) superfamily, member 15 | <i>TNFSF15</i>                |                                         |

| Megabase (Mb) interval | VEGA locus identification no. (longest 5' end located within Mb interval) | Curated locus | Mouse gene symbol (identifier in MGD) | Mouse gene name                                      | Orthologous human gene symbol | Comment                                  |
|------------------------|---------------------------------------------------------------------------|---------------|---------------------------------------|------------------------------------------------------|-------------------------------|------------------------------------------|
|                        | OTTMUSG00000000301                                                        | <i>Tnfsf8</i> | <i>Tnfsf8</i>                         | tumor necrosis factor (ligand) superfamily, member 8 | <i>TNFSF8</i>                 |                                          |
|                        | OTTMUSG00000000302                                                        | <i>Tnc</i>    | <i>Tnc</i>                            | tenascin C                                           | <i>TNC</i>                    |                                          |
| 3                      | OTTMUSG00000000318                                                        | <i>Pappa</i>  | <i>Pappa</i>                          | pregnancy-associated plasma protein A                | <i>PAPPA</i>                  |                                          |
|                        | OTTMUSG00000000317                                                        | <i>Trim32</i> | <i>Trim32</i>                         | tripartite motif protein 32                          | <i>TRIM32</i>                 | Located within intron 14 of <i>Astn2</i> |
| 4                      | OTTMUSG00000000315                                                        | <i>Astn2</i>  | <i>Astn2</i>                          | astrotactin 2                                        | <i>ASTN2</i>                  |                                          |
| 5                      | OTTMUSG00000000227                                                        | <i>Tlr4</i>   | <i>Tlr4</i>                           | toll-like receptor 4                                 | <i>TLR4</i>                   |                                          |
| 6                      | No genes                                                                  |               |                                       |                                                      |                               |                                          |
| 7                      | OTTMUSG000000003                                                          | <i>Dbccr1</i> | <i>Dbccr1</i>                         | deleted in bladder cancer                            | <i>DBC1</i>                   |                                          |

| Megabase (Mb) interval | VEGA locus identification no. (longest 5' end located within Mb interval) | Curated locus   | Mouse gene symbol (identifier in MGD) | Mouse gene name                                                   | Orthologous human gene symbol | Comment                                                                  |
|------------------------|---------------------------------------------------------------------------|-----------------|---------------------------------------|-------------------------------------------------------------------|-------------------------------|--------------------------------------------------------------------------|
|                        | 10                                                                        |                 |                                       | chromosome region candidate 1 (human)                             |                               |                                                                          |
| 8                      | OTTMUSG00000000307                                                        | <i>Cdk5rap2</i> | <i>Cdk5rap2</i>                       | CDK5 regulatory subunit associated protein 2                      | <i>CDK5RAP2</i>               |                                                                          |
|                        | OTTMUSG00000000314                                                        | <i>Egfl5</i>    | <i>Egfl5</i>                          | EGF-like-domain, multiple 5                                       | <i>EGFL5</i>                  |                                                                          |
| 9                      | No genes                                                                  |                 |                                       |                                                                   |                               |                                                                          |
| 10                     | OTTMUSG00000000276                                                        | RP24-168J7.2    | Not in MGD                            |                                                                   | Absent                        | 295 amino acid ORF, no human homologue                                   |
|                        | OTTMUSG00000000333                                                        | <i>Tle1</i>     | <i>Tle1</i>                           | transducin-like enhancer of split 1, homolog of Drosophila E(spl) | <i>TLE1</i>                   |                                                                          |
| 11                     | OTTMUSG00000000336                                                        | RP24-191C1.1    | <i>Aldoa-ps2</i>                      | aldolase 1, A isoform, pseudogene 2                               | Absent                        | Intronless gene, very similar to aldolase A, no human or rat equivalent. |

| Megabase (Mb) interval | VEGA locus identification no. (longest 5' end located within Mb interval) | Curated locus | Mouse gene symbol (identifier in MGD) | Mouse gene name       | Orthologous human gene symbol | Comment                                                                                                                                        |
|------------------------|---------------------------------------------------------------------------|---------------|---------------------------------------|-----------------------|-------------------------------|------------------------------------------------------------------------------------------------------------------------------------------------|
|                        |                                                                           |               |                                       |                       |                               | Probable expressed pseudogene                                                                                                                  |
|                        | OTTMUSG00000001246                                                        | RP23-289L21.1 | <i>Gm428</i>                          | Gene Model 428 (NCBI) | Absent                        | 354 amino acid ORF. No human orthologue                                                                                                        |
|                        | OTTMUSG00000000281                                                        | RP23-355N20.2 | <i>Gm428</i>                          | Gene Model 428 (NCBI) | Absent                        | 5x local amplification. Unknown if all are transcribed. Encode 360 amino acid ORF, almost identical to OTTMUSG00000001246, no human orthologue |
|                        | OTTMUSG00000000280                                                        | RP23-355N20.1 | <i>Gm428</i>                          | Gene Model 428 (NCBI) | Absent                        |                                                                                                                                                |
|                        | OTTMUSG00000000282                                                        | RP23-355N20.3 | <i>Gm428</i>                          | Gene Model 428 (NCBI) | Absent                        |                                                                                                                                                |

| Megabase (Mb) interval | VEGA locus identification no. (longest 5' end located within Mb interval) | Curated locus | Mouse gene symbol (identifier in MGD) | Mouse gene name                   | Orthologous human gene symbol | Comment                                                                                                                                        |
|------------------------|---------------------------------------------------------------------------|---------------|---------------------------------------|-----------------------------------|-------------------------------|------------------------------------------------------------------------------------------------------------------------------------------------|
|                        | OTTMUSG000000002<br>83                                                    | RP23-355N20.4 | <i>Gm428</i>                          | Gene Model 428 (NCBI)             | Absent                        |                                                                                                                                                |
|                        | OTTMUSG000000002<br>84                                                    | RP23-355N20.5 | <i>Gm428</i>                          | Gene Model 428 (NCBI)             | Absent                        |                                                                                                                                                |
| 12                     | OTTMUSG000000002<br>85                                                    |               | <i>Rasef</i>                          | RAS and EF hand domain containing | <i>RASEF</i>                  |                                                                                                                                                |
|                        | OTTMUSG000000040<br>13                                                    | RP23-292J1.1  | <i>Gm428</i>                          | Gene Model 428 (NCBI)             | Absent                        | 4x local amplification. Unknown if all are transcribed. Encode 360 amino acid ORF, almost identical to OTTMUSG00000001246, no human orthologue |
|                        | OTTMUSG000000040<br>12                                                    | RP23-292J1.2  | <i>Gm428</i>                          | Gene Model 428 (NCBI)             | Absent                        |                                                                                                                                                |

| Megabase (Mb) interval | VEGA locus identification no. (longest 5' end located within Mb interval) | Curated locus | Mouse gene symbol (identifier in MGD) | Mouse gene name              | Orthologous human gene symbol | Comment                                                                                                 |
|------------------------|---------------------------------------------------------------------------|---------------|---------------------------------------|------------------------------|-------------------------------|---------------------------------------------------------------------------------------------------------|
|                        | OTTMUSG00000014862                                                        | RP23-292J1.7  | <i>Gm428</i>                          | Gene Model 428 (NCBI)        | Absent                        |                                                                                                         |
|                        | OTTMUSG00000004010                                                        | RP23-292J1.3  | <i>Gm428</i>                          | Gene Model 428 (NCBI)        | Absent                        |                                                                                                         |
|                        | OTTMUSG00000004011                                                        | RP23-292J1.4  | <i>2310002L09Rik</i>                  | RIKEN cDNA 2310002L09 gene   | Absent                        | Encodes a 217 amino acid ORF. Transcript is very similar to 3' end of <i>Frmd</i> . No human orthologue |
|                        | OTTMUSG00000000793                                                        | <i>Frmd3</i>  | <i>Frmd3</i>                          | FERM domain containing 3     | <i>FRMD3</i>                  |                                                                                                         |
|                        | OTTMUSG00000000345                                                        | <i>Jmjd2c</i> | <i>Jmjd2c</i>                         | jumonji domain containing 2C | <i>JMJD2C</i>                 |                                                                                                         |
| 13                     | OTTMUSG00000000360                                                        | RP24-200F10.1 | 3110001D03Rik                         | RIKEN cDNA 3110001D03 gene   | <i>C9Orf123</i>               |                                                                                                         |
| 14                     | No 5' ends                                                                |               |                                       |                              |                               | Contains protein coding                                                                                 |

| Megabase (Mb) interval | VEGA locus identification no. (longest 5' end located within Mb interval) | Curated locus | Mouse gene symbol (identifier in MGD) | Mouse gene name                                               | Orthologous human gene symbol | Comment                               |
|------------------------|---------------------------------------------------------------------------|---------------|---------------------------------------|---------------------------------------------------------------|-------------------------------|---------------------------------------|
|                        |                                                                           |               |                                       |                                                               |                               | exons of <i>Ptprd</i>                 |
| 15                     | No 5' ends                                                                |               |                                       |                                                               |                               | Contains 5' UTR exons of <i>Ptprd</i> |
| 16                     | OTTMUSG00000000304                                                        | <i>Ptprd</i>  | <i>Ptprd</i>                          | protein tyrosine phosphatase, receptor type, D                | <i>PTPRD</i>                  |                                       |
| 17                     | No genes                                                                  |               |                                       |                                                               |                               |                                       |
| 18                     | No genes                                                                  |               |                                       |                                                               |                               |                                       |
| 19                     | OTTMUSG00000000391                                                        | <i>Tyrp1</i>  | <i>Tyrp1</i>                          | Tyrosinase related protein 1                                  | <i>TYRP1</i>                  |                                       |
|                        | OTTMUSG00000000392                                                        | RP24-318C20.1 | <i>D4Bwg0951e</i>                     | DNA segment, Chr 4, Brigham & Women's Genetics 0951 expressed | <i>C9orf150</i>               |                                       |
|                        | OTTMUSG00000000815                                                        | <i>Mpdz</i>   | <i>Mpdz</i>                           | multiple PDZ domain protein                                   | <i>MPDZ</i>                   |                                       |



| <b>Megabase (Mb) interval</b> | <b>VEGA locus identification no. (longest 5' end located within Mb interval)</b> | <b>Curated locus</b> | <b>Mouse gene symbol (identifier in MGD)</b> | <b>Mouse gene name</b>                              | <b>Orthologous human gene symbol</b> | <b>Comment</b> |
|-------------------------------|----------------------------------------------------------------------------------|----------------------|----------------------------------------------|-----------------------------------------------------|--------------------------------------|----------------|
| 20                            | OTTMUSG000000003<br>95                                                           | <i>Nfib</i>          | <i>Nfib</i>                                  | nuclear factor I/B                                  | <i>NFIB</i>                          |                |
| 21                            | OTTMUSG000000002<br>97                                                           | <i>Zdhhc21</i>       | <i>Zdhhc21</i>                               | zinc finger, DHHC domain containing 21              | <i>ZDHHC21</i>                       |                |
|                               | OTTMUSG000000004<br>10                                                           | <i>Cer1</i>          | <i>Cer1</i>                                  | cerberus 1 homolog                                  | <i>CER1</i>                          |                |
|                               | OTTMUSG000000004<br>04                                                           | RP23-410K19.1        | <i>Frem1</i>                                 | Fras1 related extracellular matrix protein 1        | <i>FREM1</i>                         |                |
|                               | OTTMUSG000000000<br>31                                                           | RP23-17O21.2         | 1810054D07Rik                                | RIKEN cDNA 1810054D07 gene                          | <i>C9orf52</i>                       |                |
|                               | OTTMUSG000000000<br>33                                                           | <i>Snopc3</i>        | <i>Snopc3</i>                                | small nuclear RNA activating complex, polypeptide 3 | <i>SNAPC3</i>                        |                |
|                               | OTTMUSG000000000                                                                 | <i>Psip1</i>         | <i>Psip1</i>                                 | PC4 and SFRS1                                       | <i>PSIP1</i>                         |                |

| <b>Megabase (Mb) interval</b> | <b>VEGA locus identification no. (longest 5' end located within Mb interval)</b> | <b>Curated locus</b> | <b>Mouse gene symbol (identifier in MGD)</b> | <b>Mouse gene name</b>        | <b>Orthologous human gene symbol</b> | <b>Comment</b> |
|-------------------------------|----------------------------------------------------------------------------------|----------------------|----------------------------------------------|-------------------------------|--------------------------------------|----------------|
|                               | 34                                                                               |                      |                                              | interacting protein 1         |                                      |                |
|                               | OTTMUSG000000008<br>32                                                           | RP23-311B24.5        | <i>A330015D16Rik</i>                         | RIKEN cDNA<br>A330015D16 gene | <i>C9Orf93</i>                       |                |
| 22                            | OTTMUSG000000067<br>57                                                           | <i>Bnc2</i>          | <i>Bnc2</i>                                  | basonuclin 2                  | <i>BNC2</i>                          |                |
