# Supplementary material
Source: PubMed Central journal article supplement (PMC1450144)
Supplement: pnas_0600199103_3.pdf [file pnas_0600199103_3.pdf]

**Table 2. Primer sequences of markers used for mapping key deletion endpoints**

| Deletion          | Marker       | Forward primer sequence<br>(5'→3') | Reverse primer sequence<br>(5'→3') |
|-------------------|--------------|------------------------------------|------------------------------------|
| 11Pu<br>(prox)    | jmjdc2c-ex18 | CTGATAAGGCCCCAGAATCA               | ACCACGTAAGGCCAGTCATC               |
|                   | jmjdc2c-ex22 | TAGGTTCCCTTCGACCCTGTG              | TGGGGTCAAACAAATGACTG               |
| 8Pub<br>(prox)    | 8Pub74.9     | TGCAAATGATGGTGAAGAGG               | CCATAATGCAAGACCCACT                |
|                   | 8Pub75.1     | GCACAAGAGACCTGGGAGAC               | TTTCCTCAGGATCCTCTCCA               |
| 11R30M<br>(dist)  | 286H15       | AGTCAGCTGAGACCACAGGAG              | GAATTGACGGGAAGTCACAG               |
|                   | D4Rck140     | CATGATCTGGCTGCTGCG                 | GAATTCACCTCACAGCTA                 |
| 9R75VH<br>(dist)  | Nfibex4lge   | AGATGCATTTCAGAGCGTGTC              | TGAGCGTTACAGAACACAAGG              |
|                   | Nfib5'       | GCTCGCAGCAAAGTTTCG                 | AGATGCCCAAGAAAATCTTCC              |
| 46UTHc<br>(dist)  | Frem1iii-ex4 | AACGGAAGGCCAAAATATCC               | TTGGGGTCCATTTTGTGAAT               |
|                   | DEPC2-823    | AGGCGCAACATTAAGTTCTATC             | TGGGTCCCTAATGATGTCCTTTC            |
| 8Pub<br>(dist)    | Novel2(Bnc2) | TTTGGTCAACAGTTTACGATGC             | TGCACCAGGAACAGTTTATTTG             |
|                   | D4Jkn1       | GGACCGGGTACATAGAGAAG               | CTATATCTCTTACTAATTTCTTAAGTG        |
| 9R75VH<br>(prox)  | 8Pub75.1     | As above                           | As above                           |
|                   | 8Pub75.4     | CACAAGCCATAAAACCAGGA               | TTGTGAACTGGGAAGCACAC               |
| 46UTHc<br>(prox)  | r77.3        | TGCACACAATAAAGTTGAAAGG             | TGTGGAGACTCTCAGGAAAACA             |
|                   | 129L11       | GGGCCTTTTACTCTGGTGAC*              | ATTGTTTTCCCTGCAAACC                |
| 173G<br>(dist)    | 395J04-SP6   | GGGTTGTGGGTTTCTCAGTG*              | CTAGCTAGCGTTTCGTGCAG               |
|                   | 395J04-10k   | GGAATGGCGAGAGAAATGAA               | GTCTCAGCAAGCCTGACCTC               |
| 1THO-IV<br>(dist) | 395J04-10k   | As above                           | As above                           |
|                   | s79.48       | GTGAGTGTGTGGGGACTTT                | TCCCTGCTCCTATTGCATCT               |

Primer sequences used in PCR to amplify sequences from C3H, 101, *Mus spretus*, and deletion/*spretus* heterozygous DNA. The amplified fragments were subsequently sequenced by using the same primers; SNPs were identified between laboratory strains and *M. spretus* and presence or absence of these SNPs in the heterozygous samples used to identify extent of deletions.

\*Two primers are not present with 100% identity in the sequence assembly in Vega. The equivalent sequences in Vega are: 129L11, GGGCCTTTTCATCTGGTGAC; 395J04-SP6, GGGTTGTGGGTTTCTCAGTG.
