# Supplementary material
Source: PubMed Central journal article supplement (PMC1450144)
Supplement: pnas_0600199103_4.pdf [file pnas_0600199103_4.pdf]

**Table 3. Markers used for mapping key deletion endpoints**

| Mutation     | Deletion endpoint                                    | Marker               |                      |                      |                 |
|--------------|------------------------------------------------------|----------------------|----------------------|----------------------|-----------------|
|              |                                                      | Proximal endpoint    |                      | Distal endpoint      |                 |
| <b>14Rn1</b> | <b>11Pu (prox)</b><br><b>(lethal)</b>                | jmjdc2c-<br>ex18 (R) | jmjdc2c-<br>ex22 (L) |                      |                 |
|              | <b>8Pub (prox)</b><br><b>(nonlethal)</b>             |                      |                      | 8Pub74.9 (R)         | 8Pub75.1<br>(L) |
| <b>14Rn2</b> | <b>11R30M</b><br><b>(dist)</b><br><b>(nonlethal)</b> | 286H15 (L)           | D4Rck140<br>(R)      |                      |                 |
|              | <b>9R75VH</b><br><b>(dist) (lethal)</b>              |                      |                      | Nfibex4lge<br>(L)    | Nfib5' (R)      |
| <b>14Rn3</b> | <b>46UTHc</b><br><b>(dist)</b><br><b>(nonlethal)</b> | Frem1iii-<br>ex4 (L) | DEPC2-<br>823 (R)    |                      |                 |
|              | <b>8Pub (dist)</b><br><b>(lethal)</b>                |                      |                      | Novel2<br>(Bnc2) (L) | D4Jkn1 (R)      |

| Mutation | Deletion endpoint                        | Marker            |                   |                   |            |
|----------|------------------------------------------|-------------------|-------------------|-------------------|------------|
|          |                                          | Proximal endpoint |                   | Distal endpoint   |            |
| baf      | <b>9R75VH</b><br>(prox) (prox-baf)       | 8Pub75.1<br>(R)   | 8Pub75.4<br>(L)   |                   |            |
|          | <b>46UTHc</b><br>(prox) (prox-nonbaf)    |                   |                   | r77.3 (R)         | 129L11 (L) |
|          | <b>173G (dist)</b><br>(distal-baf)       |                   |                   | 395J04-10k<br>(L) | s79.48 (R) |
|          | <b>ITHO-IV</b><br>(dist) (distal-nonbaf) | 395J04-SP6<br>(L) | 395J04-10k<br>(R) |                   |            |

Closest deletion endpoints that define the mutant phenotype in column 1 are listed in column 2; mutations mapping proximal to *Tyrp1* are defined by proximal (prox) endpoints and those mapping distal by distal (dist) endpoints. The key markers that position the endpoints are in columns 3-6, the endpoint being between the marker retained and the marker lost. Retained (R) and lost (L) at the point of marker based on polymorphism between C3H/101 (deletion chromosome) and the *M. Spretus* background.
