# Supplementary material
Source: PubMed Central journal article supplement (PMC1450144)
Supplement: pnas_0600199103_5.pdf [file pnas_0600199103_5.pdf]

**Table 4. Accession numbers for sequences reported in the paper**

|             |             |             |             |             |
|-------------|-------------|-------------|-------------|-------------|
| AL672272.10 | AL805946.5  | AL845338.4  | AL929181.2  | AL512586.13 |
| AL732464.19 | AL844142.5  | AL928592.13 | AL845517.2  | AL512585.12 |
| AL929551.10 | AL928548.5  | AL929499.5  | AL844848.12 | AL670884.7  |
| AL691431.20 | AL844601.4  | AL845340.11 | BX296523.4  | AL844604.4  |
| AL928565.9  | BX322649.4  | BX640475.3  | AL929553.6  | AL670865.8  |
| AL691496.13 | CR352264.6  | AL773513.3  | AL845158.5  | AL670939.6  |
| AL683828.8  | BX571887.3  | AL844600.3  | AL845508.11 | CR352325.4  |
| AL928624.4  | AL589845.8  | BX088577.3  | AL954675.7  | CR388076.6  |
| AL691484.14 | BX649539.6  | AL805941.7  | AL845335.13 | BX682542.5  |
| AL691468.12 | AL844139.4  | BX640496.10 | AL845333.3  | AL671007.9  |
| AL732599.5  | BX936372.3  | AL928642.5  | AL845496.5  | BX649410.18 |
| AL954665.4  | BX950219.10 | BX088569.3  | AL928645.6  | AL670928.7  |
| AL732556.7  | BX088555.3  | BX088558.3  | AL928625.5  | AL591611.8  |
| AL732556.7  | AL773517.4  | BX276104.14 | AL954376.4  | AL773518.3  |
| AL714006.13 | BX470110.2  | AL954177.4  | BX649450.5  | BX324149.4  |
| AL732566.5  | BX957291.4  | BX247953.2  | AL954189.5  | AL592283.5  |
| AL714011.12 | BX088573.4  | BX088585.4  | AL928566.4  | AL670769.3  |
| AL732581.5  | BX649413.8  | BX294159.20 | BX247952.2  | AL671005.7  |
| BX649255.2  | AL805940.7  | CR925836.1  | BX649236.1  | AL670958.4  |
| AL731821.10 | AL805944.8  | BX855596.4  | BX072541.1  | AL773515.7  |
| AL929431.15 | BX855609.2  | BX088570.4  | BX649291.3  | BX682543.5  |
| AL691481.15 | BX470127.2  | BX957282.2  | AL844589.3  | BX571885.7  |
| AL691491.11 | AL773511.5  | AL844607.4  | BX855606.3  | AL670851.7  |
| AL929454.7  | BX664623.7  | BX088553.4  | AL954382.3  | BX682545.5  |
| AL691454.15 | AL844157.5  | AL928771.6  | CR388082.3  | BX936355.7  |
| AL691456.7  | AL845317.7  | BX936366.8  | AL928631.4  | CR405712.3  |
| AL691474.29 | AL928651.13 | BX537258.3  | AL844599.4  | AL928772.8  |
| AL837523.7  | AL929409.5  | AL928552.7  | BX842611.2  | BX571891.4  |
| AL691438.16 | AL845502.5  | AL845294.3  | AL954174.5  | AL807790.15 |
| AL691475.18 | AL845171.5  | CR396588.3  | BX470109.3  | BX004796.6  |
| AL731829.10 | AL844906.18 | AL773510.5  | AL805943.6  | AL772261.5  |
| AL713878.15 | AL929442.9  | BX323585.4  | BX571685.2  | BX004826.4  |
| AL928609.4  | AL845255.2  | AL805927.4  | AL773519.5  | AL805919.10 |
| AL691512.11 | AL844905.5  | BX323549.16 | AL844602.6  | AL772137.8  |
| BX001064.3  | BX072580.4  | AL928579.6  | AL773507.7  |             |
| BX649609.2  | AL845501.9  | BX004866.22 | BX640502.3  |             |

These sequences also represent the clone contig across the region, in order column 1, rows 1-36, column 2, rows 1-36, etc.
