# Supplementary material
Source: PubMed Central journal article supplement (PMC1450144)

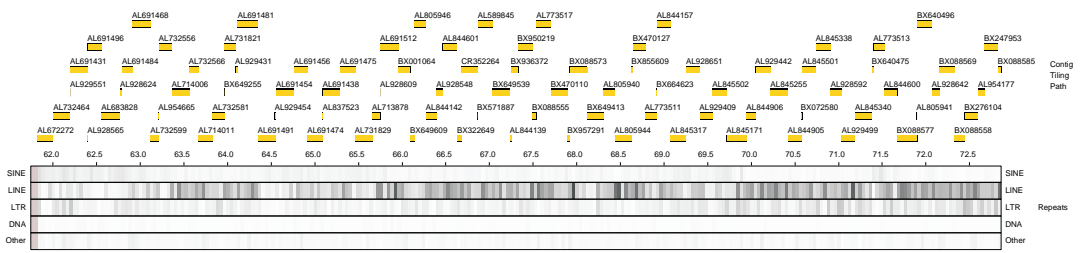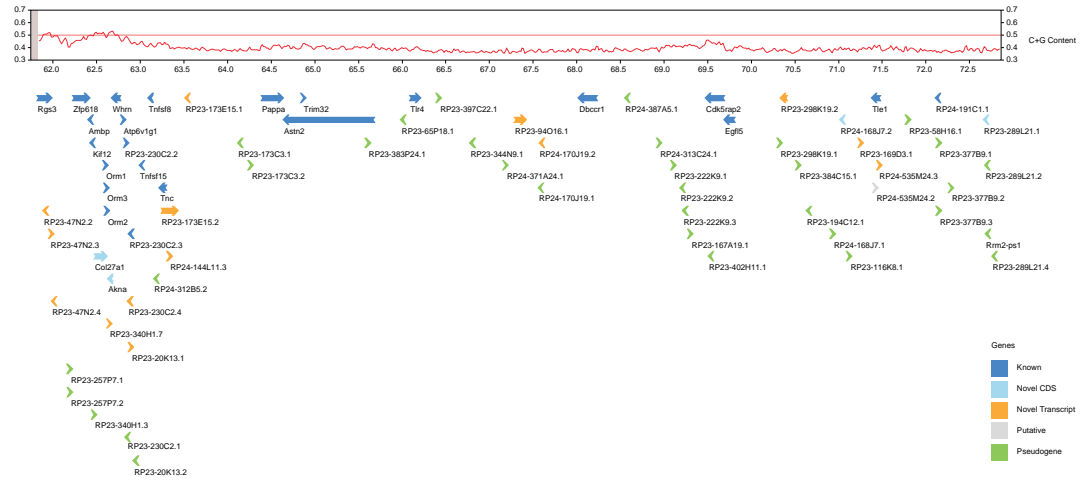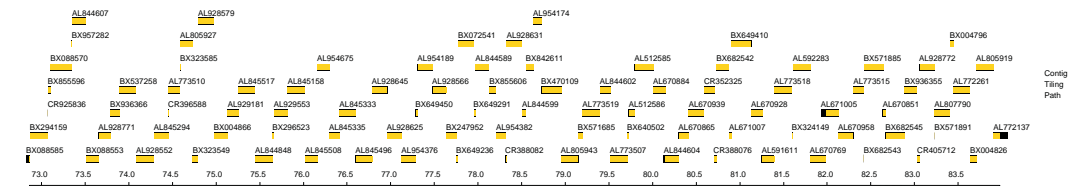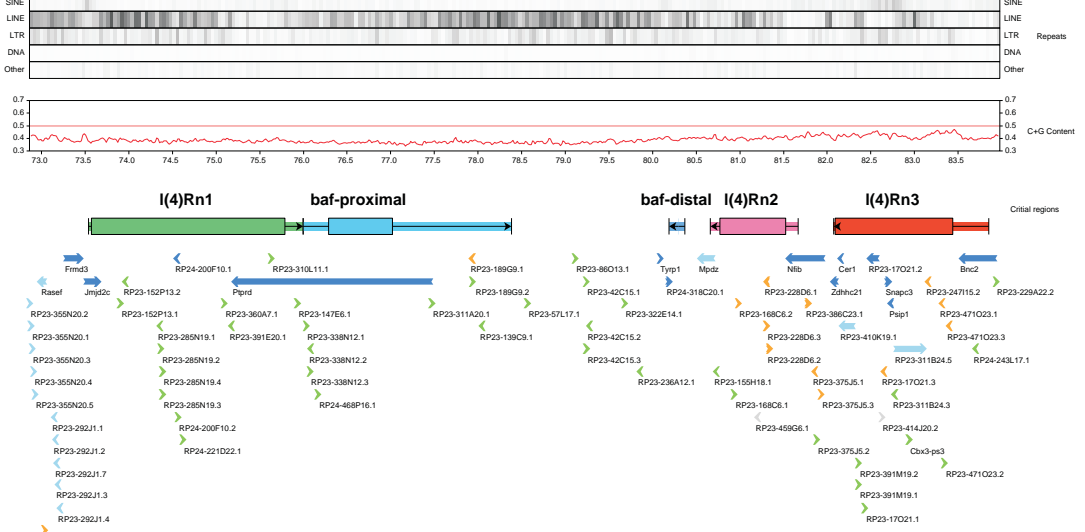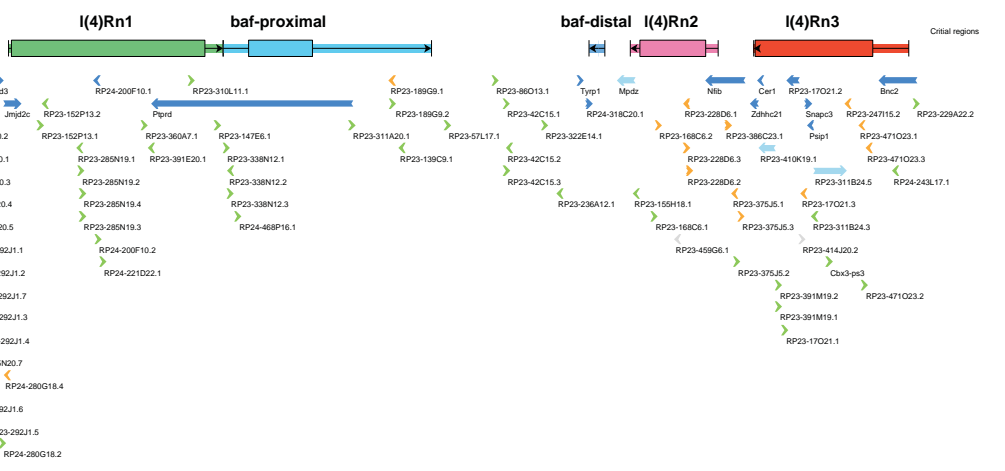

Supplement: pnas_0600199103_1.pdf [file pnas_0600199103_1.pdf]
